# Supplementary material
Source: PubMed Central journal article supplement (PMC4096812)
Supplement: NIHMS593095-supplement-supplementary.pdf [file NIHMS593095-supplement-supplementary.pdf]

## **BRIEF COMMUNICATIONS**

### **Parvalbumin interneurons mediate neuronal circuitry-neurogenesis coupling in the adult hippocampus**

Juan Song, Jiaqi Sun, Jonathan Moss, Zhexing Wen, Gerald J. Sun, Derek Hsu, Chun Zhong, Heydar Davoudi, Kimberly M. Christian, Nicolas Toni, Guo-li Ming and Hongjun Song

#### **Summary of supplementary information:**

Supplementary Figs. 1-9

Supplementary Movies 1-2

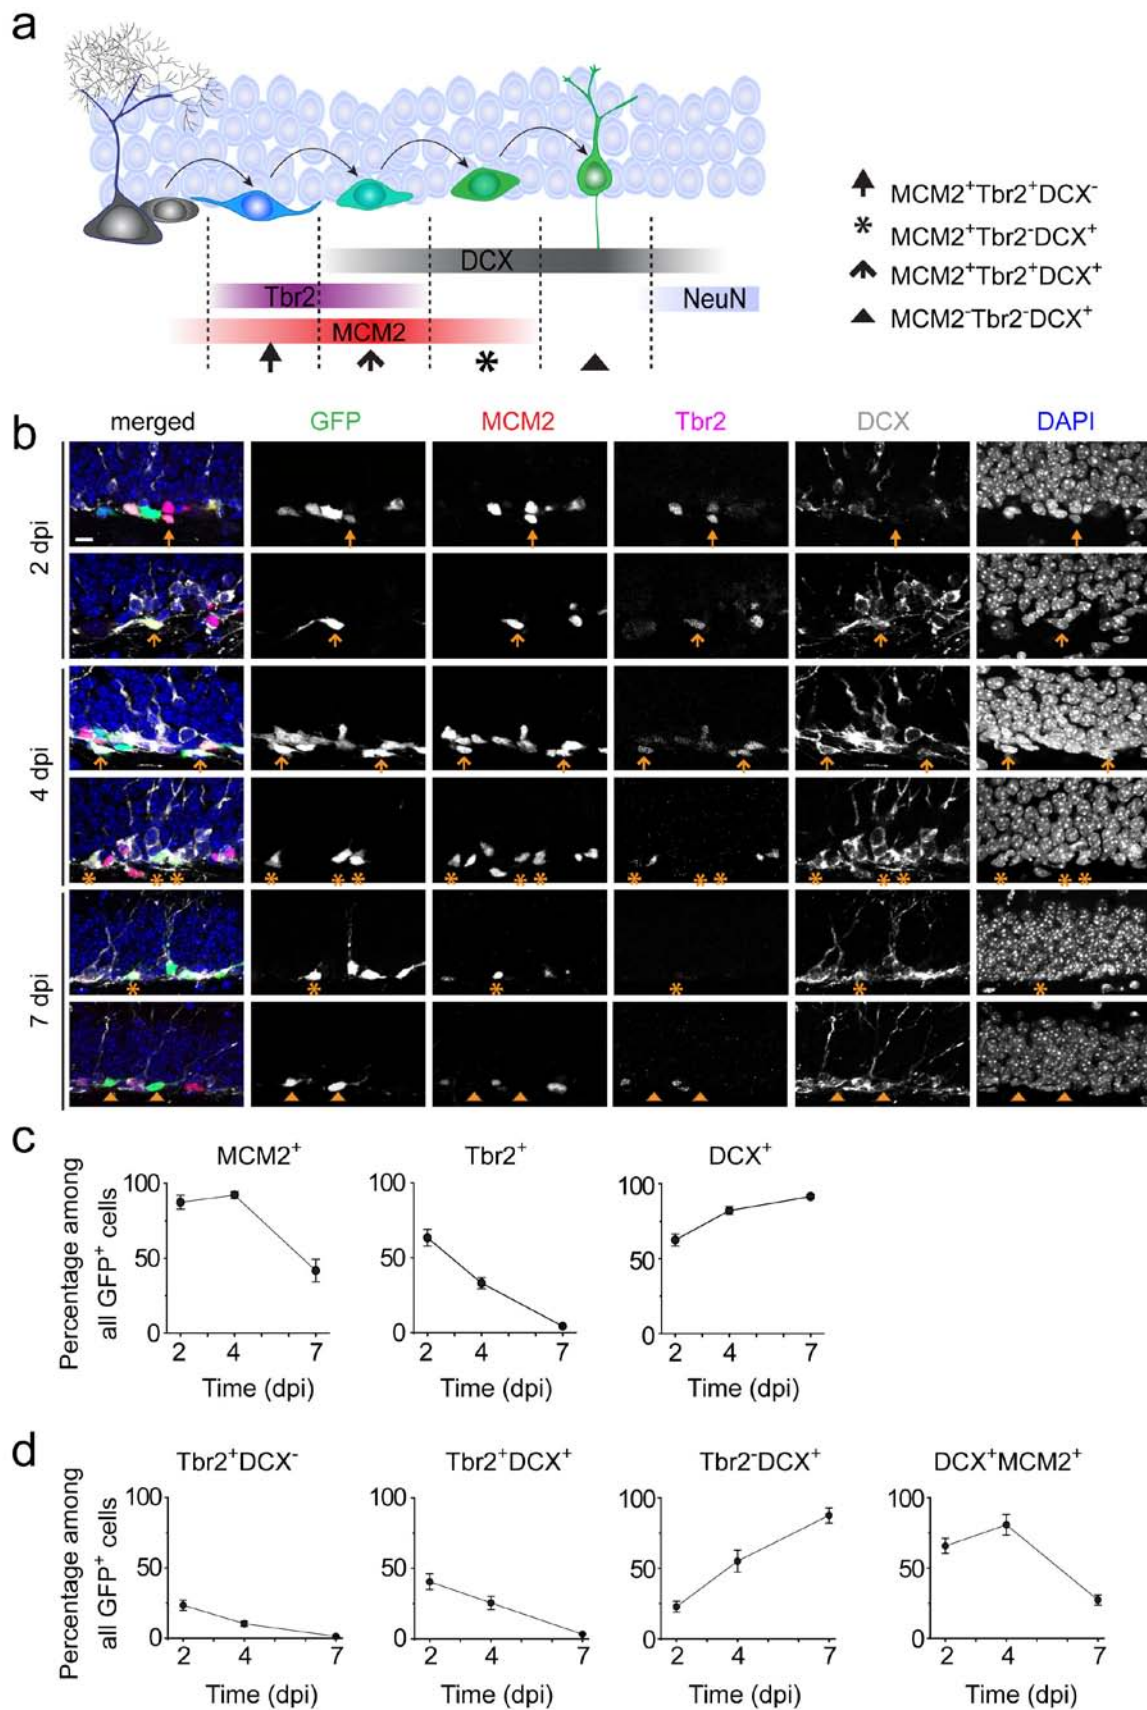

**Supplementary Fig. 1.** Immunohistological characterization of newborn progeny during early proliferative phases of adult hippocampal neurogenesis. **(a)** A schematic diagram of the current view of progenitor subtypes and their marker expression during early phases of adult

hippocampal neurogenesis. **(b-d)** Time course analysis of marker expression by retrovirally-labelled precursors in the adult dentate gyrus. Engineered onco-retroviruses expressing GFP were stereotaxically injected into the adult mouse dentate gyrus. Shown in **(b)** are sample confocal images of staining for GFP, MCM2, Tbr2, DCX and DAPI. Scale bar: 10  $\mu\text{m}$ . Shown in **(c-d)** are quantifications of different precursor subtypes among all GFP<sup>+</sup> cells at 2, 4 and 7 days post injection (dpi). Values represent mean  $\pm$  s.e.m. (n = 3-5 animals).

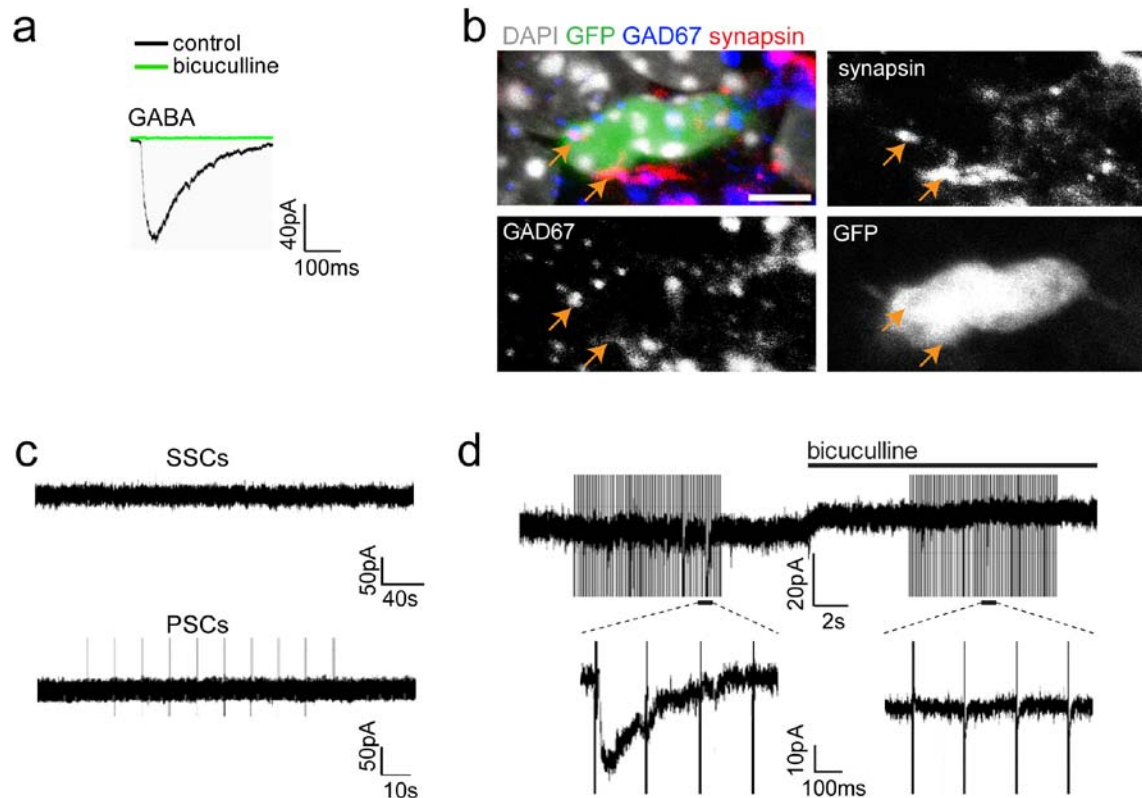

**Supplementary Fig. 2.** Electrophysiological characterization of newborn progeny during early proliferative phases of adult hippocampal neurogenesis. **(a)** Sample whole-cell voltage-clamp ( $V_m = -65$  mV) recording traces of a GFP<sup>+</sup> cell in the slice acutely prepared from injected animals at 4 dpi in response to puff of GABA (10  $\mu$ M) in the presence or absence of bicuculline (100  $\mu$ M). **(b)** Sample confocal images of staining of GFP, synapsin I (a synaptic vesicle protein), GAD67 (a GABAergic neuron marker), and DAPI. Scale bar: 5  $\mu$ m. Arrows point to GAD67<sup>+</sup>synapsin<sup>+</sup> puncta. Please see **Supplementary Movie 1** for 3D reconstruction and detail. **(c)** Sample whole-cell voltage-clamp recording traces from a GFP<sup>+</sup> cell in the slice acutely prepared from injected animals at 4 dpi. Note a lack of spontaneous synaptic current (SSC) and evoked postsynaptic current (PSC) in response to low frequency field stimulation (0.1 Hz) of the dentate granule cell layer. **(d)** Sample whole-cell voltage-clamp recording traces of a GFP<sup>+</sup> cell at 4 dpi in the acute slice in response to 5 Hz stimulation of dentate granule cell layer in the absence and presence of bicuculline (100  $\mu$ M).

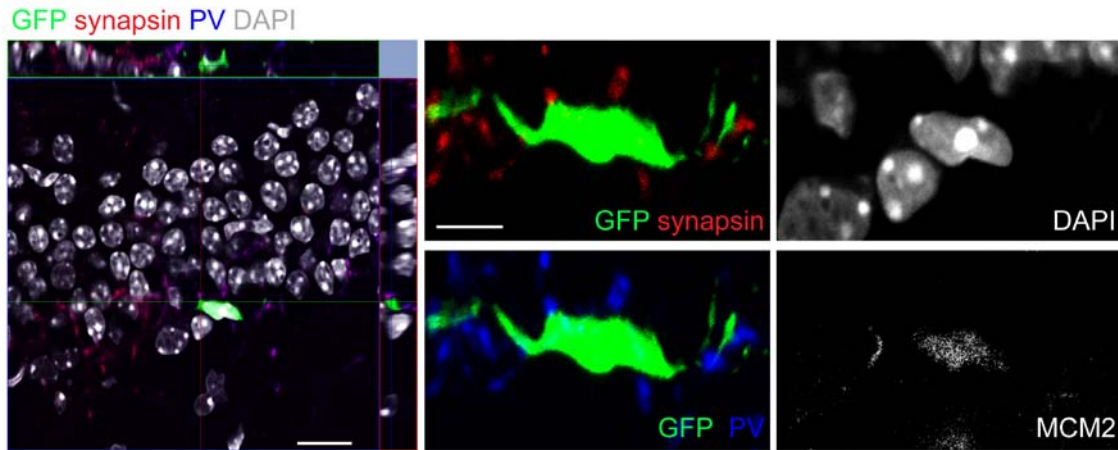

**Supplementary Fig. 3.** Synaptic inputs onto proliferating neural progeny from PV<sup>+</sup> interneurons. Shown are sample confocal images of GFP<sup>+</sup> newborn progeny at 4 dpi with immunostaining of synapsin, PV and a proliferation marker MCM2, and DAPI. Scale bars: 20  $\mu\text{m}$  (left panel) and 10  $\mu\text{m}$  (right two panels).

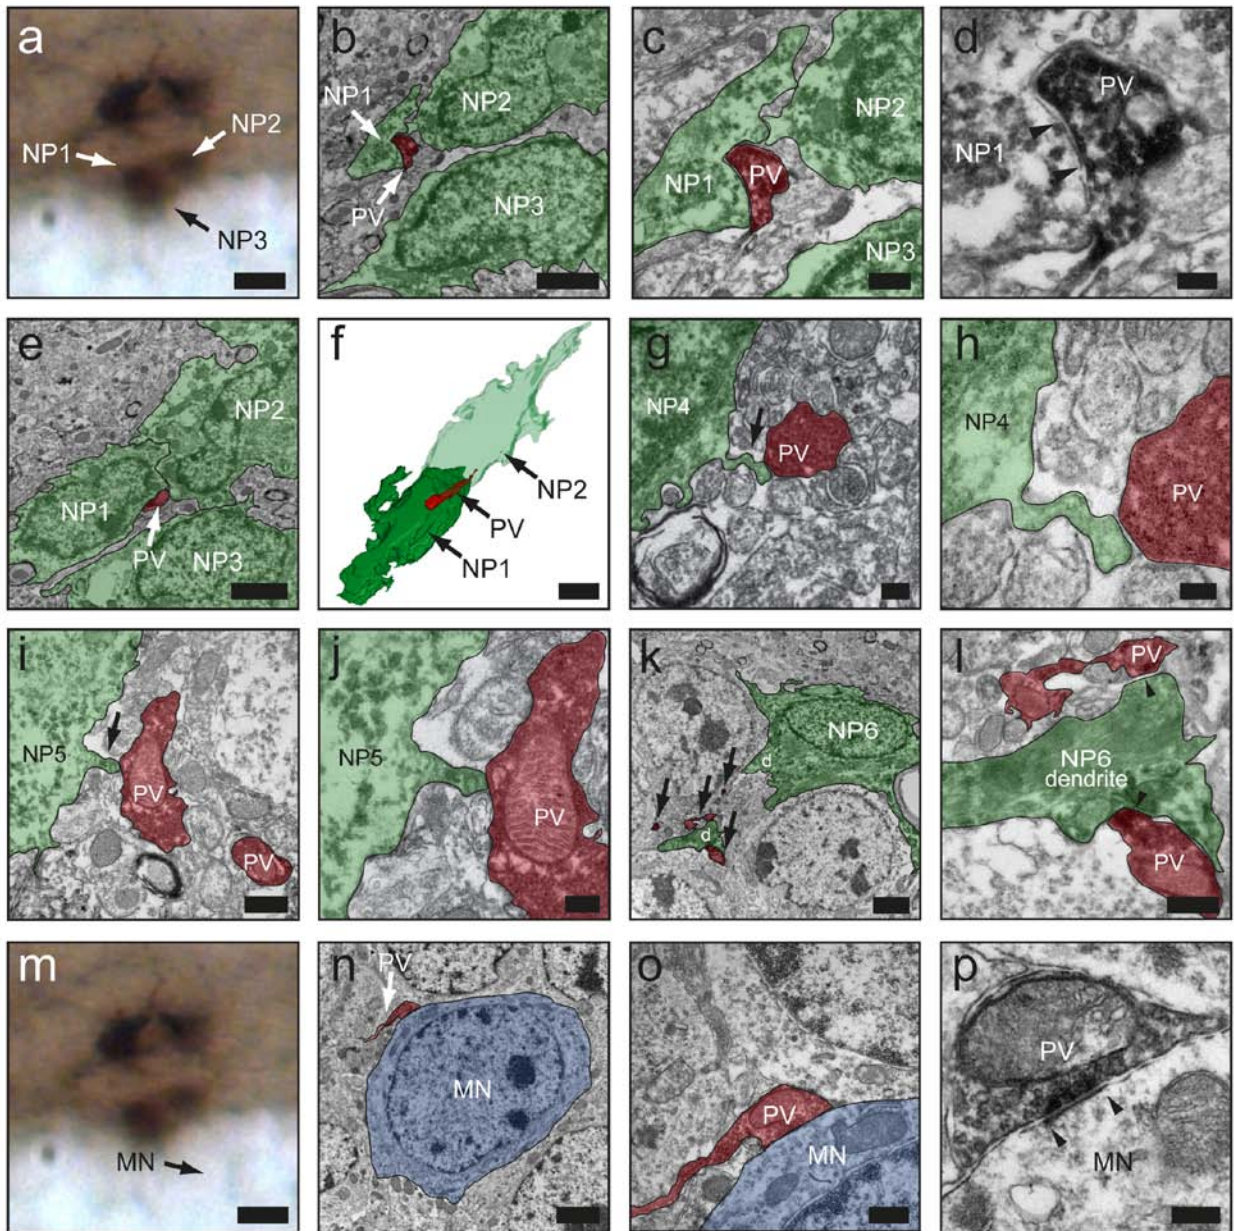

**Supplementary Fig. 4.** Immuno-EM analyses of synapses and close appositions between PV<sup>+</sup> axon terminals and newborn progeny in the adult dentate gyrus. Shown in (a-f) are steps to identify synaptic contact between a labelled PV<sup>+</sup> axon terminal and labelled newborn progeny as shown in **Fig. 1c**. Locations of the newborn progeny (NP) were identified at the light microscopic level (a) and followed through to the electron microscopic level (b-f). Electron micrographs at increasing magnifications (b-d) show the position of the PV<sup>+</sup> axon terminal in relation to three of the newborn progeny (NPs 1-3). The high magnification view of the PV<sup>+</sup> axon terminal forming a symmetrical synaptic contact (arrowheads) with the labelled newborn progeny is shown in (d) and **Fig. 1c**. The morphology of the NP1 cell body is lacking from (b-d), but is shown in (e) with the PV<sup>+</sup> axon closely apposed. To further describe the relationship between the PV<sup>+</sup> axon and NPs 1 and 2, they have been reconstructed in 3D shown in (f). Various contacts between PV<sup>+</sup> axons and newborn progeny in the adult dentate gyrus are shown in (g-l). Shown in (g-j) are two examples of PV<sup>+</sup> axons closely apposing the tips of filopodia extending from labelled newborn progeny (NPs 4 and 5), at low and high magnifications. Shown in (k-l), PV<sup>+</sup> axon segments (arrows in k) are seen both in the vicinity of a labelled newborn progeny (NP6) and closely apposing its principal dendritic extension (arrowheads in l). Note also the presence of

cytoskeleton fibers within the dendritic extension of the newborn progeny. Shown in (**m-p**) are processes to identify synaptic contact between a labelled PV<sup>+</sup> axonal terminal and an unlabelled mature granule neuron (MN) as shown in **Fig. 1e**. The location of the mature neuron (arrow) was identified at the light microscopic level (**m**) and followed through to the electron microscopic level (**n-p**). Electron micrographs at increasing magnifications (**n-p**) show the position of the PV<sup>+</sup> axon terminal in relation to the mature neuron. The high magnification view of the PV<sup>+</sup> axon terminal forming a symmetrical synaptic contact (arrowheads) with the mature neuron is shown in (**p**) and **Fig. 1e**. Newborn progeny are coloured in green, PV<sup>+</sup> axons in red and mature granule neurons in blue. Scale bars: **a**, 10  $\mu\text{m}$ ; **b**, 2  $\mu\text{m}$ ; **c**, 0.5  $\mu\text{m}$ ; **d**, 0.2  $\mu\text{m}$ ; **e**, 2  $\mu\text{m}$ ; **f**, 2  $\mu\text{m}$ ; **g**, 0.2  $\mu\text{m}$ ; **h**, 0.1  $\mu\text{m}$ ; **i**, 0.5  $\mu\text{m}$ ; **j**, 0.2  $\mu\text{m}$ ; **k**, 2  $\mu\text{m}$ ; **l**, 0.5  $\mu\text{m}$ ; **m**, 10  $\mu\text{m}$ ; **n**, 2  $\mu\text{m}$ ; **o**, 1  $\mu\text{m}$ ; **p**, 0.2  $\mu\text{m}$ .

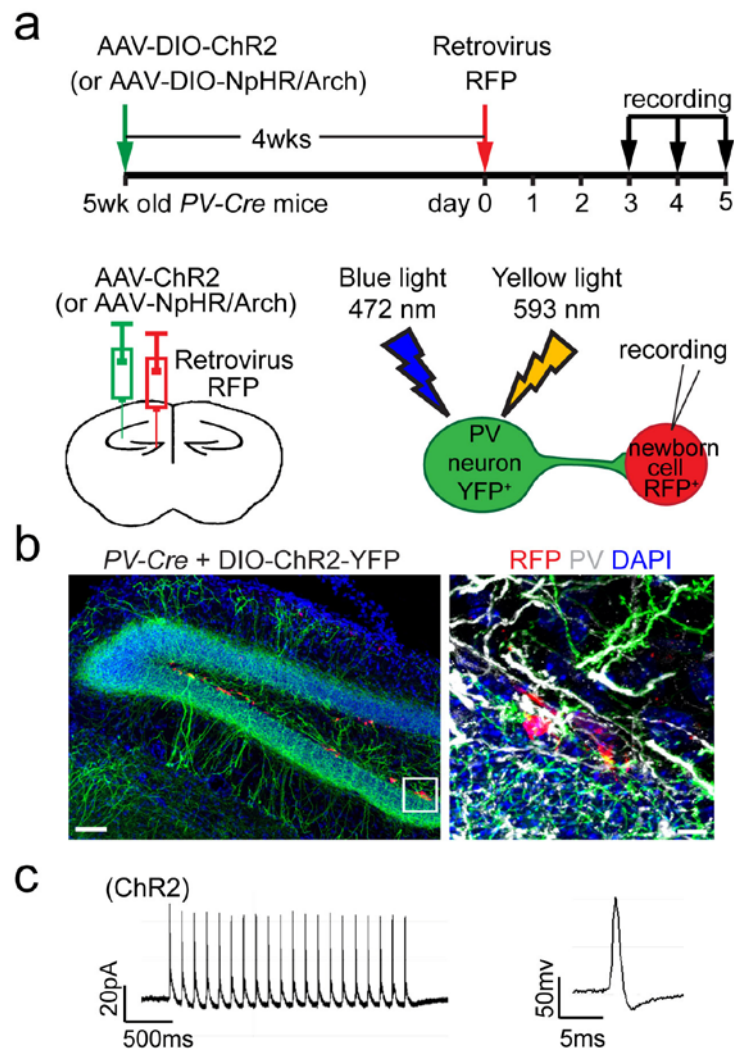

**Supplementary Fig. 5.** Characterization of PV<sup>+</sup> neuron synaptic inputs onto newborn progeny with optogenetic tools. **(a-b)** Targeting of PV<sup>+</sup> neurons and newborn progeny with engineered AAV and onco-retrovirus, respectively. Shown in **(a)** is a schematic diagram of the experimental design. Engineered AAV with Cre-dependent expression of ChR2-YFP, NpHR-YFP or Arch-YFP was stereotaxically injected into the dentate gyrus of 5 week-old *PV-Cre* mice and retrovirus expressing RFP was stereotaxically injected 4 weeks later. Electrophysiological recordings of RFP<sup>+</sup> cells were carried out in slices acutely prepared from injected animals at 3-5 dpi. Shown in **(b)** are sample confocal images of ChR2-YFP and RFP in the dentate gyrus from AAV and retroviral injected *PV-Cre* animals. Note the wide spread of YFP<sup>+</sup> fibers surrounding RFP<sup>+</sup> cells. Scale bars: 50  $\mu$ m (left) and 10  $\mu$ m (right). **(c)** Effective light-induced manipulation of PV<sup>+</sup> neuron firing in slices acutely prepared from AAV injected animals. Shown are sample traces of whole-cell recording of a ChR2-YFP<sup>+</sup> neuron under current-clamp mode upon light-stimulation (472 nm blue light at 8 Hz, 5 ms).



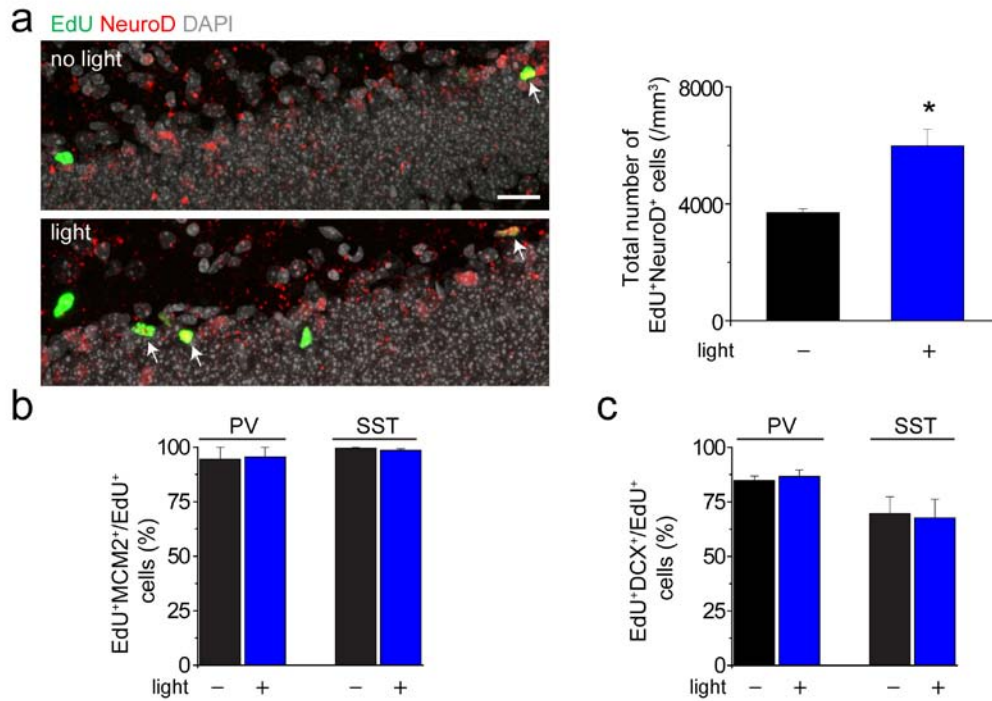

**Supplementary Fig. 6.** Effect of optogenetic activation of PV<sup>+</sup> or SST<sup>+</sup> interneurons during early proliferative phases of adult hippocampal neurogenesis *in vivo*. **(a)** Increased NeuroD<sup>+</sup> newborn progeny upon PV<sup>+</sup> neurons activation. Shown on the left are sample confocal images of NeuroD immunostaining, EdU and DAPI. Arrows point to EdU<sup>+</sup>NeuroD<sup>+</sup> newborn progeny. Scale bar: 50  $\mu$ m. Shown on the right is a summary of quantification of EdU<sup>+</sup>NeuroD<sup>+</sup> cells under different conditions. Values represent mean  $\pm$  s.e.m. ( $n = 3$  animals; \*:  $P < 0.05$ ; Student's t-test). **(b-c)** Quantifications of percentages of EdU<sup>+</sup> cells that were also MCM2<sup>+</sup> (proliferating neural progeny; **b**), or were DCX<sup>+</sup> (newborn neuronal progeny; **c**) at 4 dpi. Values represent mean  $\pm$  s.e.m. ( $n = 3-5$  animals;  $P > 0.10$ ; Student's t-test). The same groups of animals as in **Figs. 2c-d** were examined.

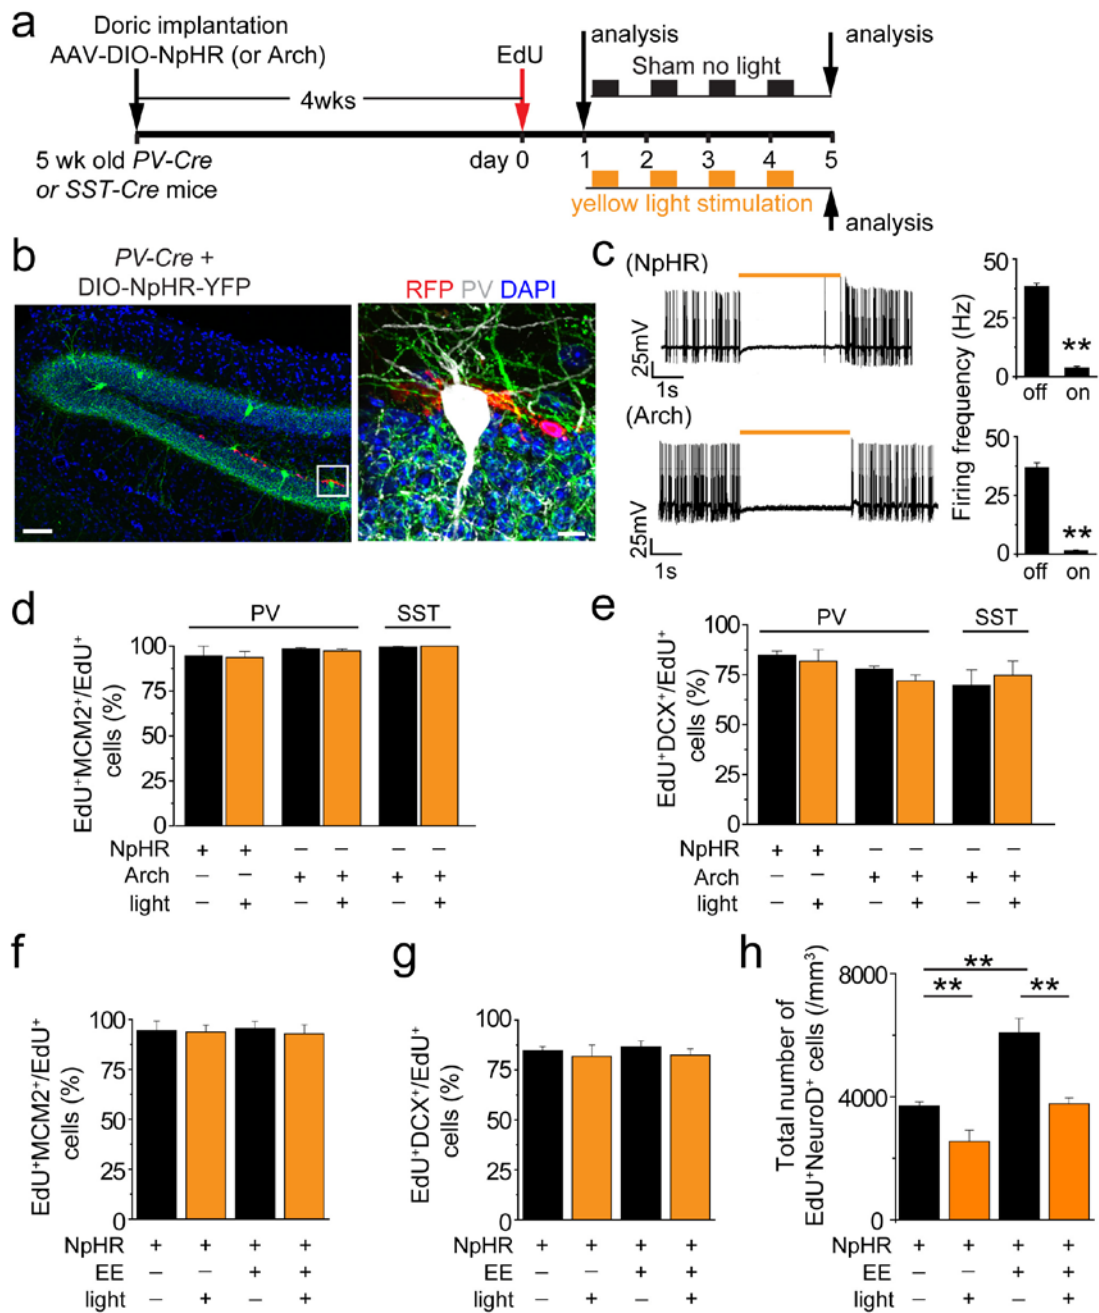

**Supplementary Fig. 7.** Effect of suppressing PV<sup>+</sup>, or SST<sup>+</sup>, interneuron activation during early phases of adult hippocampal neurogenesis *in vivo*. **(a)** A schematic diagram of experimental design for **Fig. 3a-e**. EdU (41.1 mg/kg body weight) was *i.p.* injected 4 times 2.5 hrs apart at day 0 and continuous yellow light (593 nm; constant or no light sham control) was delivered 8 hrs per day between day 1 and day 4. Animals were processed for analysis on day 1 or day 4. **(b)** Sample confocal images of NpHR-YFP and RFP in the dentate gyrus from AAV and retroviral injected PV-Cre animals. Note the wide spread of YFP<sup>+</sup> fibers surrounding RFP<sup>+</sup> cells. Scale bars: 50  $\mu$ m (left) and 10  $\mu$ m (right). **(c)** Effective light-induced suppression of PV<sup>+</sup> neuron firing in slices acutely prepared from AAV injected animals. Shown are sample traces of whole-cell recordings of NpHR- or Arch-expressing YFP<sup>+</sup> neurons under current-clamp mode upon light stimulation (593 nm yellow light; constant). A current pulse of 100 pA current was delivered to YFP<sup>+</sup> neurons, and the number of action potentials was quantified with or without yellow light on. Values represent mean  $\pm$  s.e.m. ( $n = 6$  cells; \*\*:  $P < 0.01$ ; Student's t-test). **(d-e)** Quantification

of percentages of EdU<sup>+</sup> cells that were MCM2<sup>+</sup> (proliferating neural progeny; **d**), or were DCX<sup>+</sup> (newborn neuronal progeny; **e**) at 4 dpi. The same groups of animals as in **Figs. 3a-b** were examined. Values represent mean  $\pm$  s.e.m. (n = 3-5 animals;  $P > 0.10$ ; Student's t-test). (**f-h**) Quantification of percentages of EdU<sup>+</sup> cells that were MCM2<sup>+</sup> (proliferating neural progeny, **f**), or were DCX<sup>+</sup> (newborn neuronal progeny, **g**), and stereological quantification of EdU<sup>+</sup>NeuroD<sup>+</sup> cells (**h**) at 4 dpi. The same groups of animals as in **Fig. 3h** were analyzed. Values represent mean  $\pm$  s.e.m. (n = 3-5 animals; \*\*:  $P < 0.01$ ; two-way ANOVA).

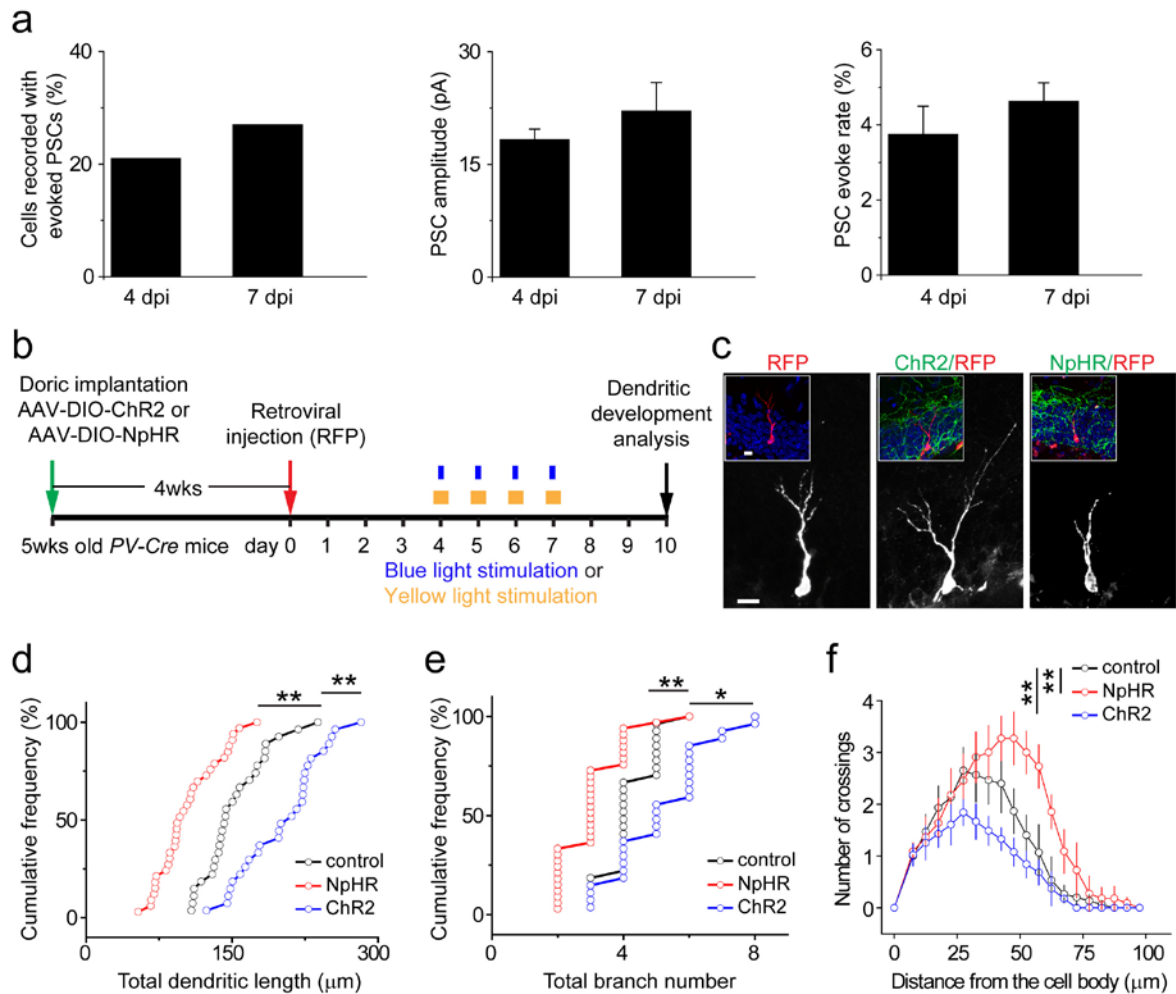

**Supplementary Fig. 8.** PV<sup>+</sup> neuron activity regulates dendritic growth of newborn neurons during adult hippocampal neurogenesis. **(a)** Presence of GABAergic synaptic inputs onto newborn neurons at 7 dpi from PV<sup>+</sup> neurons. Same as in **Fig. 1g**, except that GFP<sup>+</sup> newborn progeny at 4 and 7 dpi were examined and summaries for percentages of GFP<sup>+</sup> cells recorded that exhibited PSCs (left), the mean amplitudes of PSCs (middle) and the PSC induction rate (right) are shown. The same data for 4 dpi as in **Fig. 1g** are shown for comparison. **(b-f)** Optogenetic manipulation of PV<sup>+</sup> neuron activity affects dendritic development of newborn neurons. Shown in **(b)** is a schematic diagram of experimental procedure. Shown in **(c)** are sample projected confocal images of immunostaining for GFP and RFP. Scale bars: 20 μm. Also shown are summaries of total dendritic length **(d)** and branch numbers **(e)**. Each dot represents data from one individual neuron (\*\*:  $P < 0.01$ ; \*:  $P < 0.05$ ; two sample Kolmogorov–Smirnov test). Shown in **(f)** is a Sholl analysis for dendritic complexity. Values represent mean  $\pm$  s.e.m. ( $n = 30-33$  neurons; \*\*:  $P < 0.01$ ; two sample Kolmogorov–Smirnov test).

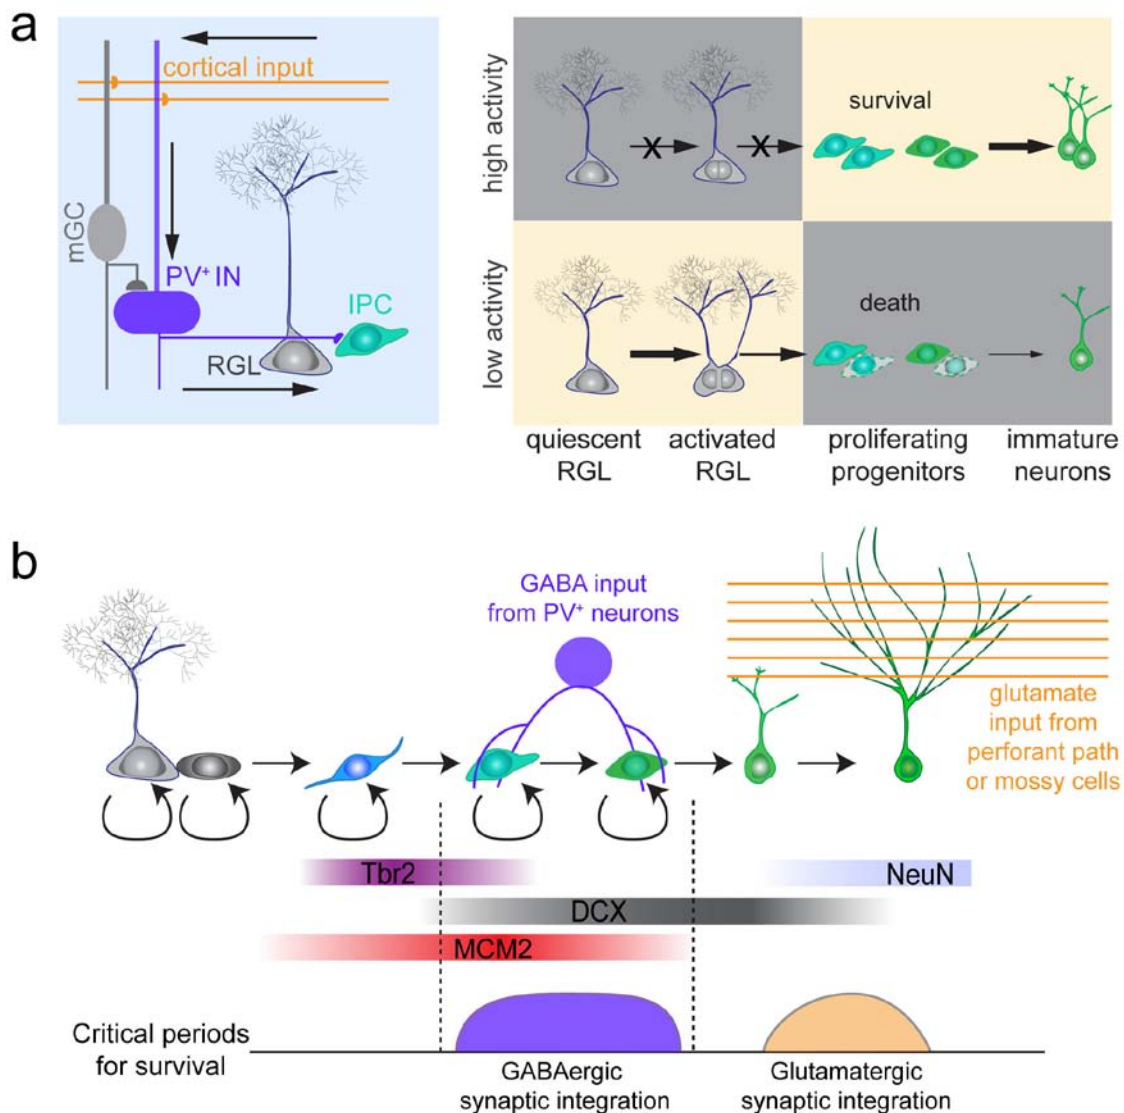

**Supplementary Fig. 9.** Models of activity-dependent diametric regulation of adult hippocampal neurogenesis processes and two critical periods of activity-dependent survival of newborn neuronal progeny. **(a)** Diametric regulation of two sequential proliferative processes of adult hippocampal neurogenesis by PV<sup>+</sup> neuron activity. Shown on the left is an illustration of the dentate circuitry where entorhinal cortical inputs activate dentate granule neurons, which in turn activate PV<sup>+</sup> interneurons. Shown on the right is a model of diametric regulation of quiescent neural stem cell activation and survival and maturation of their proliferative neuronal progeny: during heightened activity within dentate gyrus (top panel), activation of PV<sup>+</sup> neurons promotes the survival and maturation of proliferating neuronal progenitor and inhibits quiescent neural stem cell activation; conversely, when the activity in the dentate gyrus is low (bottom panel), decreased PV<sup>+</sup> neuron activity suppresses the survival of proliferating neuronal progenitors and simultaneously promotes expansion of the quiescent neural stem cell pool via symmetric cell division. **(b)** Two critical periods of activity-dependent regulation of progeny survival during adult hippocampal neurogenesis. The first phase occurs during GABAergic synaptic integration of proliferative newborn progeny involving PV<sup>+</sup> local interneurons. The second phase occurs during glutamatergic synaptic integration of post-mitotic newborn neurons via a glutamate-mediated mechanism.

**Supplementary Movie 1.** Close association between GFP<sup>+</sup> newborn progeny and GAD67<sup>+</sup>Synapsin I<sup>+</sup> synaptic puncta in the adult dentate gyrus. Adult mice injected with onco-retroviruses to express GFP in proliferating progenitors in the adult SGZ. Shown is a surface-rendered reconstruction of a series of confocal images of the dentate gyrus (90 x 90 x 30 μm) for immunostaining of GFP (green), GAD67 (blue) and synapsin I (red) at 4 dpi.

**Supplementary Movie 2.** Close association between GFP<sup>+</sup> newborn progeny and PV<sup>+</sup>Synapsin I<sup>+</sup> synaptic puncta in the adult dentate gyrus. Adult mice were injected with onco-retroviruses to express GFP in proliferating progenitors in the adult SGZ. Shown is a surface-rendered reconstruction of a series of confocal images of the dentate gyrus (90 x 90 x 30 μm) for immunostaining of GFP (green), PV (blue) and synapsin I (red) at 4 dpi.
